# Supplementary material for: In vivo monoclonal antibody efficacy against SARS-CoV-2 variant strains
Source: Res Sq. 2021 Apr 23:rs.3.rs-448370. Preprint. [Version 1] doi: 10.21203/rs.3.rs-448370/v1 (PMC8132254; doi:10.21203/rs.3.rs-448370/v1)
Supplement: Supplement 7 [file 68422ef43055594d9fbc242f.xlsx]

## Sheet: E484K D614G
POS	REF	ALT	EFFECT	GENE	VAF	PROTEIN	filename
7486	A	T	synonymous_variant	ORF1ab	1	p.Ser2407Ser
7489	T	A	synonymous_variant	ORF1ab	0.993939	p.Thr2408Thr
8782	C	T	synonymous_variant	ORF1ab	0.98893	p.Ser2839Ser
23012	G	A	missense_variant	S	1	p.Glu484Lys
23403	A	G	missense_variant	S	0.994565	p.Asp614Gly
28144	T	C	missense_variant	ORF8	0.984906	p.Leu84Ser
							P1 E484K/D614G hACE2-TMPRSS2

## Sheet: P2 D614G TMP
POS	REF	ALT	EFFECT	GENE	VAF	PROTEIN	filename
7486	A	T	synonymous_variant	ORF1ab	1	p.Ser2407Ser
7489	T	A	synonymous_variant	ORF1ab	0.990826	p.Thr2408Thr
8782	C	T	synonymous_variant	ORF1ab	0.995413	p.Ser2839Ser
23403	A	G	missense_variant	S	0.978355	p.Asp614Gly
28144	T	C	missense_variant	ORF8	0.994382	p.Leu84Ser
							P2 D614G TMPRSS2

## Sheet: P1 Wash SA B.1.351 TMP
POS	REF	ALT	EFFECT	GENE	VAF	PROTEIN	filename
7486	A	T	synonymous_variant	ORF1ab	1	p.Ser2407Ser
7489	T	A	synonymous_variant	ORF1ab	0.986301	p.Thr2408Thr
8782	C	T	synonymous_variant	ORF1ab	0.976526	p.Ser2839Ser
21801	A	C	missense_variant	S	0.985782	p.Asp80Ala
22206	A	G	missense_variant	S	0.983673	p.Asp215Gly
22280	ACTTTACTTG	A	disruptive_inframe_deletion	S	0.919847	p.Leu242_Leu244del
22813	G	T	missense_variant	S	1	p.Lys417Asn
23012	G	A	missense_variant	S	0.937984	p.Glu484Lys
23063	A	T	missense_variant	S	0.987342	p.Asn501Tyr
23403	A	G	missense_variant	S	0.968127	p.Asp614Gly
23664	C	T	missense_variant	S	0.984127	p.Ala701Val
28144	T	C	missense_variant	ORF8	0.993333	p.Leu84Ser
							P1 Wash-SA.B.1.351 TMP

## Sheet: P1 B.1.1.7 TMP
POS	REF	ALT	EFFECT	GENE	VAF	PROTEIN	filename
241	C	T	upstream_gene_variant		1
913	C	T	synonymous_variant	ORF1ab	0.992084	p.Ser216Ser
3037	C	T	synonymous_variant	ORF1ab	0.990654	p.Phe924Phe
3177	C	T	missense_variant	ORF1ab	0.996296	p.Pro971Leu
3267	C	T	missense_variant	ORF1ab	0.989286	p.Thr1001Ile
5388	C	A	missense_variant	ORF1ab	0.995984	p.Ala1708Asp
5986	C	T	synonymous_variant	ORF1ab	1	p.Phe1907Phe
6954	T	C	missense_variant	ORF1ab	1	p.Ile2230Thr
11287	GTCTGGTTTT	G	conservative_inframe_deletion	ORF1ab	0.919492	p.Ser3675_Phe3677del
11291	G	A	missense_variant	ORF1ab	0.6	p.Gly3676Ser
14408	C	T	synonymous_variant	ORF1ab	0.911765	p.Leu4715Leu
14676	C	T	missense_variant	ORF1ab	0.95082	p.Pro4804Leu
15279	C	T	missense_variant	ORF1ab	0.989848	p.Thr5005Ile
16176	T	C	missense_variant	ORF1ab	0.946746	p.Leu5304Pro
21764	ATACATG	A	disruptive_inframe_deletion	S	0.996599	p.His69_Val70del
21990	TTTA	T	disruptive_inframe_deletion	S	1	p.Tyr145del
23063	A	T	missense_variant	S	0.985714	p.Asn501Tyr
23271	C	A	missense_variant	S	0.986726	p.Ala570Asp
23403	A	G	missense_variant	S	0.983974	p.Asp614Gly
23604	C	A	missense_variant	S	0.995074	p.Pro681His
23709	C	T	missense_variant	S	0.943878	p.Thr716Ile
24506	T	G	missense_variant	S	1	p.Ser982Ala
24914	G	C	missense_variant	S	0.977612	p.Asp1118His
27972	C	T	stop_gained	ORF8	0.980769	p.Gln27*
28048	G	T	missense_variant	ORF8	0.974359	p.Arg52Ile
28111	A	G	missense_variant	ORF8	0.975	p.Tyr73Cys
28270	TA	T	upstream_gene_variant		0.943925
28280	G	C	missense_variant	N	1	p.Asp3His
28281	A	T	missense_variant	N	0.990099	p.Asp3Val
28282	T	A	missense_variant	N	0.893805	p.Asp3Glu
28881	G	A	missense_variant	N	0.992424	p.Arg203Lys
28882	G	A	synonymous_variant	N	0.992424	p.Arg203Arg
28883	G	C	missense_variant	N	0.834395	p.Gly204Arg
28977	C	T	missense_variant	N	0.990654	p.Ser235Phe
							P1 B.1.1.7 TMP

## Sheet: B.1.429
#CHROM	POS	ID	REF	ALT	QUAL	FILTER	INFO	EFFECT	PUTATIVE_IMPACT	GENE_NAME	GENE_ID	FEATURE_TYPE	FEATURE_ID	TRANSCRIPT_TYPE	EXON_INTRON_RANK	HGVSc	HGVSp	cDNA_POSITION_AND_LENGTH	CDS_POSITION_AND_LENGTH	PROTEIN_POSITION_AND_LENGTH	DISTANCE_TO_FEATURE	ERROR
NC_045512.2	26284	.	G	T	22314	PASS	DP=33694;AF=0.057458;SB=12;DP4=14473,17069,931,1005;ANN=T	missense_variant	MODERATE	E	GU280_gp04	transcript	GU280_gp04	protein_coding	2021-01-01	c.40G>T	p.Val14Phe	40/228	40/228	14/75		,T
NC_045512.2	26324	.	T	C	48574	PASS	DP=30095;AF=0.124340;SB=21;DP4=11968,14320,1615,2127;ANN=C	missense_variant	MODERATE	E	GU280_gp04	transcript	GU280_gp04	protein_coding	2021-01-01	c.80T>C	p.Leu27Ser	80/228	80/228	27/75		,C
NC_045512.2	26681	.	C	T	49314	PASS	DP=32561;AF=0.996069;SB=23;DP4=6,22,15761,16672;ANN=T	synonymous_variant	LOW	M	GU280_gp05	transcript	GU280_gp05	protein_coding	2021-01-01	c.159C>T	p.Phe53Phe	159/669	159/669	53/222		,T
NC_045512.2	28357	.	G	A	49314	PASS	DP=38117;AF=0.978015;SB=1;DP4=226,208,19750,17529;ANN=A	synonymous_variant	LOW	N	GU280_gp10	transcript	GU280_gp10	protein_coding	2021-01-01	c.84G>A	p.Gln28Gln	84/1260	84/1260	28/419		,A
NC_045512.2	28411	.	C	T	49314	PASS	DP=44036;AF=0.662004;SB=16;DP4=6922,7712,13458,15694;ANN=T	synonymous_variant	LOW	N	GU280_gp10	transcript	GU280_gp10	protein_coding	2021-01-01	c.138C>T	p.Pro46Pro	138/1260	138/1260	46/419		,T
NC_045512.2	29362	.	C	T	49314	PASS	DP=28543;AF=0.963809;SB=904;DP4=41,441,14263,13247;ANN=T	synonymous_variant	LOW	N	GU280_gp10	transcript	GU280_gp10	protein_coding	2021-01-01	c.1089C>T	p.Phe363Phe	1089/1260	1089/1260	363/419		,T
NC_045512.2	28887	.	C	T	49314	PASS	DP=39103;AF=0.990461;SB=140;DP4=21,91,21114,17616;ANN=T	missense_variant	MODERATE	N	GU280_gp10	transcript	GU280_gp10	protein_coding	2021-01-01	c.614C>T	p.Thr205Ile	614/1260	614/1260	205/419		,T
NC_045512.2	28975	.	G	T	49314	PASS	DP=41483;AF=0.992985;SB=9;DP4=14,26,19815,21377;ANN=T	missense_variant	MODERATE	N	GU280_gp10	transcript	GU280_gp10	protein_coding	2021-01-01	c.702G>T	p.Met234Ile	702/1260	702/1260	234/419		,T
NC_045512.2	2395	.	C	T	49314	PASS	DP=19482;AF=0.995021;SB=6;DP4=10,17,9534,9851;ANN=T	synonymous_variant	LOW	ORF1ab	GU280_gp01	transcript	GU280_gp01	protein_coding	2021-01-02	c.2130C>T	p.Val710Val	2130/21291	2130/21291	710/7096		,T
NC_045512.2	2597	.	T	C	49314	PASS	DP=23928;AF=0.998203;SB=8;DP4=5,12,11921,11964;ANN=C	synonymous_variant	LOW	ORF1ab	GU280_gp01	transcript	GU280_gp01	protein_coding	2021-01-02	c.2332T>C	p.Leu778Leu	2332/21291	2332/21291	778/7096		,C
NC_045512.2	3037	.	C	T	49314	PASS	DP=16314;AF=0.989825;SB=78;DP4=0,26,8107,8041;ANN=T	synonymous_variant	LOW	ORF1ab	GU280_gp01	transcript	GU280_gp01	protein_coding	2021-01-02	c.2772C>T	p.Phe924Phe	2772/21291	2772/21291	924/7096		,T
NC_045512.2	8947	.	C	T	49314	PASS	DP=19548;AF=0.994526;SB=12;DP4=19,10,9247,10194;ANN=T	synonymous_variant	LOW	ORF1ab	GU280_gp01	transcript	GU280_gp01	protein_coding	2021-01-02	c.8682C>T	p.Asn2894Asn	8682/21291	8682/21291	2894/7096		,T
NC_045512.2	12100	.	C	T	49314	PASS	DP=17048;AF=0.994897;SB=0;DP4=20,15,9495,7466;ANN=T	synonymous_variant	LOW	ORF1ab	GU280_gp01	transcript	GU280_gp01	protein_coding	2021-01-02	c.11835C>T	p.Ala3945Ala	11835/21291	11835/21291	3945/7096		,T
NC_045512.2	15810	.	C	T	49314	PASS	DP=19908;AF=0.996484;SB=11;DP4=8,3,9008,10830;ANN=T	synonymous_variant	LOW	ORF1ab	GU280_gp01	transcript	GU280_gp01	protein_coding	2021-02-02	c.15546C>T	p.Asn5182Asn	15546/21291	15546/21291	5182/7096		,T
NC_045512.2	1059	.	C	T	49314	PASS	DP=18422;AF=0.994626;SB=92;DP4=44,4,9053,9270;ANN=T	missense_variant	MODERATE	ORF1ab	GU280_gp01	transcript	GU280_gp01	protein_coding	2021-01-02	c.794C>T	p.Thr265Ile	794/21291	794/21291	265/7096		,T
NC_045512.2	2838	.	C	T	49314	PASS	DP=20506;AF=0.995465;SB=30;DP4=4,21,10194,10219;ANN=T	missense_variant	MODERATE	ORF1ab	GU280_gp01	transcript	GU280_gp01	protein_coding	2021-01-02	c.2573C>T	p.Ser858Phe	2573/21291	2573/21291	858/7096		,T
NC_045512.2	12878	.	A	G	49314	PASS	DP=18010;AF=0.993393;SB=21;DP4=26,6,10235,7656;ANN=G	missense_variant	MODERATE	ORF1ab	GU280_gp01	transcript	GU280_gp01	protein_coding	2021-01-02	c.12613A>G	p.Ile4205Val	12613/21291	12613/21291	4205/7096		,G
NC_045512.2	14408	.	C	T	49314	PASS	DP=16874;AF=0.992592;SB=0;DP4=18,15,8832,7917;ANN=T	missense_variant	MODERATE	ORF1ab	GU280_gp01	transcript	GU280_gp01	protein_coding	2021-02-02	c.14144C>T	p.Pro4715Leu	14144/21291	14144/21291	4715/7096		,T
NC_045512.2	15451	.	G	T	49314	PASS	DP=20209;AF=0.580484;SB=2;DP4=4076,4205,5830,5901;ANN=T	missense_variant	MODERATE	ORF1ab	GU280_gp01	transcript	GU280_gp01	protein_coding	2021-02-02	c.15187G>T	p.Gly5063Cys	15187/21291	15187/21291	5063/7096		,T
NC_045512.2	17014	.	G	T	49314	PASS	DP=19395;AF=0.992421;SB=19;DP4=16,7,8155,11093;ANN=T	missense_variant	MODERATE	ORF1ab	GU280_gp01	transcript	GU280_gp01	protein_coding	2021-02-02	c.16750G>T	p.Asp5584Tyr	16750/21291	16750/21291	5584/7096		,T
NC_045512.2	25563	.	G	T	49314	PASS	DP=26203;AF=0.990993;SB=18;DP4=23,10,12228,13739;ANN=T	missense_variant	MODERATE	ORF3a	GU280_gp03	transcript	GU280_gp03	protein_coding	2021-01-01	c.171G>T	p.Gln57His	171/828	171/828	57/275		,T
NC_045512.2	21569	.	G	GT	7904	PASS	DP=28123;AF=0.061658;SB=5;DP4=12040,14224,817,917;INDEL;HRUN=5;ANN=GT	frameshift_variant	HIGH	S	GU280_gp02	transcript	GU280_gp02	protein_coding	2021-01-01	c.12dupT	p.Leu5fs	13/3822	13/3822	5/1273		INFO_REALIGN_3_PRIME,GT
NC_045512.2	23518	.	G	A	49314	PASS	DP=17456;AF=0.974565;SB=152;DP4=68,14,6653,10359;ANN=A	synonymous_variant	LOW	S	GU280_gp02	transcript	GU280_gp02	protein_coding	2021-01-01	c.1956G>A	p.Gly652Gly	1956/3822	1956/3822	652/1273		,A
NC_045512.2	24349	.	T	C	49314	PASS	DP=22919;AF=0.988874;SB=44;DP4=34,88,10528,12136;ANN=C	synonymous_variant	LOW	S	GU280_gp02	transcript	GU280_gp02	protein_coding	2021-01-01	c.2787T>C	p.Ser929Ser	2787/3822	2787/3822	929/1273		,C
NC_045512.2	21575	.	C	T	49314	PASS	DP=28161;AF=0.978800;SB=0;DP4=5,7,12259,15305;ANN=T	missense_variant	MODERATE	S	GU280_gp02	transcript	GU280_gp02	protein_coding	2021-01-01	c.13C>T	p.Leu5Phe	13/3822	13/3822	5/1273		,T
NC_045512.2	21600	.	G	T	49314	PASS	DP=28902;AF=0.995917;SB=35;DP4=15,2,12595,16189;ANN=T	missense_variant	MODERATE	S	GU280_gp02	transcript	GU280_gp02	protein_coding	2021-01-01	c.38G>T	p.Ser13Ile	38/3822	38/3822	13/1273		,T
NC_045512.2	22018	.	G	T	49314	PASS	DP=21881;AF=0.994196;SB=0;DP4=10,10,10020,11734;ANN=T	missense_variant	MODERATE	S	GU280_gp02	transcript	GU280_gp02	protein_coding	2021-01-01	c.456G>T	p.Trp152Cys	456/3822	456/3822	152/1273		,T
NC_045512.2	22917	.	T	G	49314	PASS	DP=18133;AF=0.974356;SB=269;DP4=28,151,9779,7889;ANN=G	missense_variant	MODERATE	S	GU280_gp02	transcript	GU280_gp02	protein_coding	2021-01-01	c.1355T>G	p.Leu452Arg	1355/3822	1355/3822	452/1273		,G
NC_045512.2	23403	.	A	G	49314	PASS	DP=29041;AF=0.995076;SB=7;DP4=20,14,13304,15594;ANN=G	missense_variant	MODERATE	S	GU280_gp02	transcript	GU280_gp02	protein_coding	2021-01-01	c.1841A>G	p.Asp614Gly	1841/3822	1841/3822	614/1273		,G
NC_045512.2	23594	.	ACTAATTCTCCTCGGCGGGCACGTAGTGTAG	A	49314	PASS	DP=26109;AF=0.437857;SB=7;DP4=7179,7620,5447,5985;INDEL;HRUN=1;ANN=A	disruptive_inframe_deletion	MODERATE	S	GU280_gp02	transcript	GU280_gp02	protein_coding	2021-01-01	c.2036_2065delATTCTCCTCGGCGGGCACGTAGTGTAGCTA	p.Asn679_Ala688del	2036/3822	2036/3822	679/1273		INFO_REALIGN_3_PRIME,A

## Sheet: P2 N501Y D614G TMP
#CHROM	POS	ID	REF	ALT	QUAL	FILTER	INFO	EFFECT	PUTATIVE_IMPACT	GENE_NAME	GENE_ID	FEATURE_TYPE	FEATURE_ID	TRANSCRIPT_TYPE	EXON_INTRON_RANK	HGVSc	HGVSp	cDNA_POSITION_AND_LENGTH	CDS_POSITION_AND_LENGTH	PROTEIN_POSITION_AND_LENGTH	DISTANCE_TO_FEATURE	ERROR
NC_045512.2	27118	.	A	T	740	PASS	DP=3165;AF=0.065403;SB=249;DP4=1418,1507,175,32;ANN=T	missense_variant	MODERATE	M	GU280_gp05	transcript	GU280_gp05	protein_coding	2021-01-01	c.596A>T	p.Tyr199Phe	596/669	596/669	199/222		,T
NC_045512.2	7486	.	A	T	41064	PASS	DP=1239;AF=0.998386;SB=6;DP4=0,2,635,602;ANN=T	synonymous_variant	LOW	ORF1ab	GU280_gp01	transcript	GU280_gp01	protein_coding	2021-01-02	c.7221A>T	p.Ser2407Ser	7221/21291	7221/21291	2407/7096		,T
NC_045512.2	7489	.	T	A	41164	PASS	DP=1229;AF=0.996745;SB=4;DP4=1,3,624,601;ANN=A	synonymous_variant	LOW	ORF1ab	GU280_gp01	transcript	GU280_gp01	protein_coding	2021-01-02	c.7224T>A	p.Thr2408Thr	7224/21291	7224/21291	2408/7096		,A
NC_045512.2	7585	.	A	T	293	PASS	DP=866;AF=0.053118;SB=1;DP4=425,382,26,20;ANN=T	synonymous_variant	LOW	ORF1ab	GU280_gp01	transcript	GU280_gp01	protein_coding	2021-01-02	c.7320A>T	p.Gly2440Gly	7320/21291	7320/21291	2440/7096		,T
NC_045512.2	8782	.	C	T	49314	PASS	DP=1660;AF=0.993374;SB=0;DP4=0,0,787,862;ANN=T	synonymous_variant	LOW	ORF1ab	GU280_gp01	transcript	GU280_gp01	protein_coding	2021-01-02	c.8517C>T	p.Ser2839Ser	8517/21291	8517/21291	2839/7096		,T
NC_045512.2	10981	.	G	T	238	PASS	DP=1495;AF=0.053512;SB=111;DP4=811,526,17,63;ANN=T	synonymous_variant	LOW	ORF1ab	GU280_gp01	transcript	GU280_gp01	protein_coding	2021-01-02	c.10716G>T	p.Val3572Val	10716/21291	10716/21291	3572/7096		,T
NC_045512.2	20442	.	A	T	515	PASS	DP=1238;AF=0.063005;SB=34;DP4=562,555,23,55;ANN=T	synonymous_variant	LOW	ORF1ab	GU280_gp01	transcript	GU280_gp01	protein_coding	2021-02-02	c.20178A>T	p.Thr6726Thr	20178/21291	20178/21291	6726/7096		,T
NC_045512.2	3936	.	A	T	470	PASS	DP=1512;AF=0.054233;SB=67;DP4=836,548,25,57;ANN=T	missense_variant	MODERATE	ORF1ab	GU280_gp01	transcript	GU280_gp01	protein_coding	2021-01-02	c.3671A>T	p.Gln1224Leu	3671/21291	3671/21291	1224/7096		,T
NC_045512.2	9792	.	A	T	300	PASS	DP=1066;AF=0.051595;SB=18;DP4=522,485,38,17;ANN=T	missense_variant	MODERATE	ORF1ab	GU280_gp01	transcript	GU280_gp01	protein_coding	2021-01-02	c.9527A>T	p.Glu3176Val	9527/21291	9527/21291	3176/7096		,T
NC_045512.2	9809	.	A	C	124	PASS	DP=1045;AF=0.051675;SB=37;DP4=557,400,17,37;ANN=C	missense_variant	MODERATE	ORF1ab	GU280_gp01	transcript	GU280_gp01	protein_coding	2021-01-02	c.9544A>C	p.Thr3182Pro	9544/21291	9544/21291	3182/7096		,C
NC_045512.2	18594	.	A	T	225	PASS	DP=818;AF=0.055012;SB=117;DP4=88,665,26,19;ANN=T	missense_variant	MODERATE	ORF1ab	GU280_gp01	transcript	GU280_gp01	protein_coding	2021-02-02	c.18330A>T	p.Leu6110Phe	18330/21291	18330/21291	6110/7096		,T
NC_045512.2	28144	.	T	C	49314	PASS	DP=5024;AF=0.993830;SB=1;DP4=3,4,2506,2487;ANN=C	missense_variant	MODERATE	ORF8	GU280_gp09	transcript	GU280_gp09	protein_coding	2021-01-01	c.251T>C	p.Leu84Ser	251/366	251/366	84/121		,C
NC_045512.2	23063	.	A	T	49314	PASS	DP=1905;AF=0.995800;SB=16;DP4=7,0,1086,811;ANN=T	missense_variant	MODERATE	S	GU280_gp02	transcript	GU280_gp02	protein_coding	2021-01-01	c.1501A>T	p.Asn501Tyr	1501/3822	1501/3822	501/1273		,T
NC_045512.2	23403	.	A	G	49314	PASS	DP=2756;AF=0.998186;SB=0;DP4=0,0,1248,1503;ANN=G	missense_variant	MODERATE	S	GU280_gp02	transcript	GU280_gp02	protein_coding	2021-01-01	c.1841A>G	p.Asp614Gly	1841/3822	1841/3822	614/1273		,G

## Sheet: P1 Wash BR B.1.1.28 TMP
#CHROM	POS	ID	REF	ALT	QUAL	FILTER	INFO	EFFECT	PUTATIVE_IMPACT	GENE_NAME	GENE_ID	FEATURE_TYPE	FEATURE_ID	TRANSCRIPT_TYPE	EXON_INTRON_RANK	HGVSc	HGVSp	cDNA_POSITION_AND_LENGTH	CDS_POSITION_AND_LENGTH	PROTEIN_POSITION_AND_LENGTH	DISTANCE_TO_FEATURE	ERROR
NC_045512.2	27118	.	A	T	575	PASS	DP=2085;AF=0.071463;SB=158;DP4=939,965,124,25;ANN=T	missense_variant	MODERATE	M	GU280_gp05	transcript	GU280_gp05	protein_coding	2021-01-01	c.596A>T	p.Tyr199Phe	596/669	596/669	199/222		,T
NC_045512.2	29403	.	A	T	732	PASS	DP=1869;AF=0.056180;SB=7;DP4=1057,681,71,34;ANN=T	missense_variant	MODERATE	N	GU280_gp10	transcript	GU280_gp10	protein_coding	2021-01-01	c.1130A>T	p.Asp377Val	1130/1260	1130/1260	377/419		,T
NC_045512.2	7285	.	A	T	308	PASS	DP=1034;AF=0.057060;SB=86;DP4=371,595,46,13;ANN=T	synonymous_variant	LOW	ORF1ab	GU280_gp01	transcript	GU280_gp01	protein_coding	2021-01-02	c.7020A>T	p.Val2340Val	7020/21291	7020/21291	2340/7096		,T
NC_045512.2	7486	.	A	T	49314	PASS	DP=1608;AF=0.996269;SB=0;DP4=0,0,818,784;ANN=T	synonymous_variant	LOW	ORF1ab	GU280_gp01	transcript	GU280_gp01	protein_coding	2021-01-02	c.7221A>T	p.Ser2407Ser	7221/21291	7221/21291	2407/7096		,T
NC_045512.2	7489	.	T	A	49314	PASS	DP=1595;AF=0.998746;SB=3;DP4=0,1,808,785;ANN=A	synonymous_variant	LOW	ORF1ab	GU280_gp01	transcript	GU280_gp01	protein_coding	2021-01-02	c.7224T>A	p.Thr2408Thr	7224/21291	7224/21291	2408/7096		,A
NC_045512.2	8782	.	C	T	49314	PASS	DP=2061;AF=0.992722;SB=3;DP4=1,0,988,1058;ANN=T	synonymous_variant	LOW	ORF1ab	GU280_gp01	transcript	GU280_gp01	protein_coding	2021-01-02	c.8517C>T	p.Ser2839Ser	8517/21291	8517/21291	2839/7096		,T
NC_045512.2	2172	.	A	T	269	PASS	DP=790;AF=0.050633;SB=7;DP4=410,326,27,13;ANN=T	missense_variant	MODERATE	ORF1ab	GU280_gp01	transcript	GU280_gp01	protein_coding	2021-01-02	c.1907A>T	p.Lys636Met	1907/21291	1907/21291	636/7096		,T
NC_045512.2	7412	.	A	T	486	PASS	DP=1371;AF=0.052516;SB=0;DP4=714,569,41,31;ANN=T	missense_variant	MODERATE	ORF1ab	GU280_gp01	transcript	GU280_gp01	protein_coding	2021-01-02	c.7147A>T	p.Met2383Leu	7147/21291	7147/21291	2383/7096		,T
NC_045512.2	9809	.	A	C	215	PASS	DP=1337;AF=0.060583;SB=11;DP4=651,547,35,46;ANN=C	missense_variant	MODERATE	ORF1ab	GU280_gp01	transcript	GU280_gp01	protein_coding	2021-01-02	c.9544A>C	p.Thr3182Pro	9544/21291	9544/21291	3182/7096		,C
NC_045512.2	18594	.	A	T	263	PASS	DP=1143;AF=0.053368;SB=114;DP4=140,907,32,29;ANN=T	missense_variant	MODERATE	ORF1ab	GU280_gp01	transcript	GU280_gp01	protein_coding	2021-02-02	c.18330A>T	p.Leu6110Phe	18330/21291	18330/21291	6110/7096		,T
NC_045512.2	18596	.	G	T	360	PASS	DP=1105;AF=0.057014;SB=280;DP4=142,883,50,13;ANN=T	missense_variant	MODERATE	ORF1ab	GU280_gp01	transcript	GU280_gp01	protein_coding	2021-02-02	c.18332G>T	p.Trp6111Leu	18332/21291	18332/21291	6111/7096		,T
NC_045512.2	28144	.	T	C	49314	PASS	DP=4005;AF=0.992010;SB=9;DP4=4,10,2016,1957;ANN=C	missense_variant	MODERATE	ORF8	GU280_gp09	transcript	GU280_gp09	protein_coding	2021-01-01	c.251T>C	p.Leu84Ser	251/366	251/366	84/121		,C
NC_045512.2	21614	.	C	T	49314	PASS	DP=2746;AF=0.997087;SB=0;DP4=0,0,1003,1735;ANN=T	missense_variant	MODERATE	S	GU280_gp02	transcript	GU280_gp02	protein_coding	2021-01-01	c.52C>T	p.Leu18Phe	52/3822	52/3822	18/1273		,T
NC_045512.2	21621	.	C	A	49314	PASS	DP=2758;AF=0.993111;SB=12;DP4=4,1,996,1743;ANN=A	missense_variant	MODERATE	S	GU280_gp02	transcript	GU280_gp02	protein_coding	2021-01-01	c.59C>A	p.Thr20Asn	59/3822	59/3822	20/1273		,A
NC_045512.2	21638	.	C	T	49314	PASS	DP=2666;AF=0.961365;SB=33;DP4=6,39,983,1580;ANN=T	missense_variant	MODERATE	S	GU280_gp02	transcript	GU280_gp02	protein_coding	2021-01-01	c.76C>T	p.Pro26Ser	76/3822	76/3822	26/1273		,T
NC_045512.2	21974	.	G	T	39537	PASS	DP=1264;AF=0.994462;SB=0;DP4=0,0,627,630;ANN=T	missense_variant	MODERATE	S	GU280_gp02	transcript	GU280_gp02	protein_coding	2021-01-01	c.412G>T	p.Asp138Tyr	412/3822	412/3822	138/1273		,T
NC_045512.2	22132	.	G	T	49314	PASS	DP=2162;AF=0.988437;SB=6;DP4=2,4,1338,799;ANN=T	missense_variant	MODERATE	S	GU280_gp02	transcript	GU280_gp02	protein_coding	2021-01-01	c.570G>T	p.Arg190Ser	570/3822	570/3822	190/1273		,T
NC_045512.2	22812	.	A	C	49314	PASS	DP=1557;AF=0.994220;SB=0;DP4=2,1,778,770;ANN=C	missense_variant	MODERATE	S	GU280_gp02	transcript	GU280_gp02	protein_coding	2021-01-01	c.1250A>C	p.Lys417Thr	1250/3822	1250/3822	417/1273		,C
NC_045512.2	23012	.	G	A	45835	PASS	DP=1560;AF=0.992949;SB=0;DP4=0,0,907,642;ANN=A	missense_variant	MODERATE	S	GU280_gp02	transcript	GU280_gp02	protein_coding	2021-01-01	c.1450G>A	p.Glu484Lys	1450/3822	1450/3822	484/1273		,A
NC_045512.2	23063	.	A	T	49314	PASS	DP=1817;AF=0.995597;SB=6;DP4=6,1,1041,768;ANN=T	missense_variant	MODERATE	S	GU280_gp02	transcript	GU280_gp02	protein_coding	2021-01-01	c.1501A>T	p.Asn501Tyr	1501/3822	1501/3822	501/1273		,T
NC_045512.2	23403	.	A	G	49314	PASS	DP=2375;AF=1.000000;SB=0;DP4=0,0,1058,1317;ANN=G	missense_variant	MODERATE	S	GU280_gp02	transcript	GU280_gp02	protein_coding	2021-01-01	c.1841A>G	p.Asp614Gly	1841/3822	1841/3822	614/1273		,G
NC_045512.2	23525	.	C	T	39295	PASS	DP=1207;AF=0.991715;SB=3;DP4=1,0,505,692;ANN=T	missense_variant	MODERATE	S	GU280_gp02	transcript	GU280_gp02	protein_coding	2021-01-01	c.1963C>T	p.His655Tyr	1963/3822	1963/3822	655/1273		,T
NC_045512.2	24642	.	C	T	49314	PASS	DP=1600;AF=0.994375;SB=2;DP4=2,0,845,746;ANN=T	missense_variant	MODERATE	S	GU280_gp02	transcript	GU280_gp02	protein_coding	2021-01-01	c.3080C>T	p.Thr1027Ile	3080/3822	3080/3822	1027/1273		,T
NC_045512.2	25088	.	G	T	41414	PASS	DP=1254;AF=0.999203;SB=3;DP4=1,0,578,675;ANN=T	missense_variant	MODERATE	S	GU280_gp02	transcript	GU280_gp02	protein_coding	2021-01-01	c.3526G>T	p.Val1176Phe	3526/3822	3526/3822	1176/1273		,T
