# Supplementary material for: In vivo monoclonal antibody efficacy against SARS-CoV-2 variant strains
Source: Res Sq. 2021 Apr 23:rs.3.rs-448370. Preprint. [Version 1] doi: 10.21203/rs.3.rs-448370/v1 (PMC8132254; doi:10.21203/rs.3.rs-448370/v1)
Supplement: Supplement 8 [file ed33f9af4f6464d5119de49c.xlsx]

## Sheet: Sheet1
	Sample	Animal	mAb treatment	Virus	Tissue	Amplicon	Sequence changes detected
	1	K18-hACE2 mouse	2196/2130	B.1.1.7	lung	No (Below LOD)
	2	K18-hACE2 mouse	2196/2130	B.1.1.7	lung	No (Below LOD)
	3	K18-hACE2 mouse	S309/S2E12	B.1.1.7	lung	YES	None
	4	K18-hACE2 mouse	S309/S2E12	B.1.1.7	lung	YES	None
	5	K18-hACE2 mouse	hE16	B.1.1.7	lung	YES	None
	6	K18-hACE2 mouse	hE16	B.1.1.7	lung	YES	None
	7	K18-hACE2 mouse	2196/2130	Wash SA-B.1.351	lung	YES	None
	8	K18-hACE2 mouse	2196/2130	Wash SA-B.1.351	lung	YES	None
	9	K18-hACE2 mouse	S309/S2E12	Wash SA-B.1.351	lung	YES	None
	10	K18-hACE2 mouse	S309/S2E12	Wash SA-B.1.351	lung	YES	None
	11	K18-hACE2 mouse	hE16	Wash SA-B.1.351	lung	YES	None
	12	K18-hACE2 mouse	hE16	Wash SA-B.1.351	lung	YES	None
	13	K18-hACE2 mouse	2196/2130	Wash BR-B.1.1.28	lung	YES	None
	14	K18-hACE2 mouse	2196/2130	Wash BR-B.1.1.28	lung	YES	None
	15	K18-hACE2 mouse	S309/S2E12	Wash BR-B.1.1.28	lung	YES	None
	16	K18-hACE2 mouse	S309/S2E12	Wash BR-B.1.1.28	lung	YES	None
	17	K18-hACE2 mouse	hE16	Wash BR-B.1.1.28	lung	YES	None
	18	K18-hACE2 mouse	hE16	Wash BR-B.1.1.28	lung	YES	None
	19	K18-hACE2 mouse	10933/10987	Wash SA-B.1.351	lung	YES	None
	20	K18-hACE2 mouse	2B04/47D11	Wash SA-B.1.351	lung	YES	None
	21	K18-hACE2 mouse	2B04/47D11	Wash SA-B.1.351	lung	YES	None
	22	K18-hACE2 mouse	LY-CoV555	Wash SA-B.1.351	lung	YES	None
	23	K18-hACE2 mouse	LY-CoV555	Wash SA-B.1.351	lung	YES	None
	24	K18-hACE2 mouse	hE16	Wash SA-B.1.351	lung	YES	None
	25	K18-hACE2 mouse	hE16	Wash SA-B.1.351	lung	YES	None
	26	K18-hACE2 mouse	2B04/47D11	Wash BR-B.1.1.28	lung	YES	None
	27	K18-hACE2 mouse	2B04/47D11	Wash BR-B.1.1.28	lung	YES	None
	28	K18-hACE2 mouse	LY-CoV555	Wash BR-B.1.1.28	lung	YES	None
	29	K18-hACE2 mouse	LY-CoV555	Wash BR-B.1.1.28	lung	YES	None
	30	K18-hACE2 mouse	hE16	Wash BR-B.1.1.28	lung	YES	None
	31	K18-hACE2 mouse	hE16	Wash BR-B.1.1.28	lung	YES	None
	32	129S2 mouse	2196/2130	Wash SA-B.1.351	lung	YES	None
	33	129S2 mouse	S309/S2E12	Wash SA-B.1.351	lung	YES	None
	34	129S2 mouse	S309/S2E12	Wash SA-B.1.351	lung	YES	None
	35	129S2 mouse	S309/S2E12	Wash SA-B.1.351	lung	YES	None
	36	129S2 mouse	hE16	Wash SA-B.1.351	lung	YES	None
	37	129S2 mouse	hE16	Wash SA-B.1.351	lung	YES	None
	38	129S2 mouse	2196/2130	Wash BR-B.1.1.28	lung	YES	None
	39	129S2 mouse	2196/2130	Wash BR-B.1.1.28	lung	YES	None
	40	129S2 mouse	2196/2130	Wash BR-B.1.1.28	lung	YES	None
	41	129S2 mouse	S309/S2E12	Wash BR-B.1.1.28	lung	YES	None
	42	129S2 mouse	hE16	Wash BR-B.1.1.28	lung	YES	None
	43	129S2 mouse	hE16	Wash BR-B.1.1.28	lung	YES	None
	44	129S2 mouse	2196/2130	B.1.1.7	lung	YES	None
	45	129S2 mouse	2196/2130	B.1.1.7	lung	YES	None
	46	129S2 mouse	2196/2130	B.1.1.7	lung	YES	None
	47	129S2 mouse	hE16	B.1.1.7	lung	YES	None
	48	129S2 mouse	hE16	B.1.1.7	lung	YES	None
	49	129S2 mouse	2196/2130	N501Y/D614G	lung	YES	None
	50	129S2 mouse	2196/2130	N501Y/D614G	lung	YES	None
	51	129S2 mouse	S309/S2E12	N501Y/D614G	lung	YES	None
	52	129S2 mouse	hE16	N501Y/D614G	lung	YES	None
	53	129S2 mouse	hE16	N501Y/D614G	lung	YES	None
	54	K18-hACE2 mouse	LY-CoV555	Wash SA-B.1.351	nasal wash	YES	None
	55	K18-hACE2 mouse	hE16	Wash SA-B.1.351	nasal wash	YES	None
	56	K18-hACE2 mouse	hE16	Wash SA-B.1.351	nasal wash	YES	None
	57	K18-hACE2 mouse	10933/10987	Wash BR-B.1.1.28	nasal wash	No (Below LOD)
	58	K18-hACE2 mouse	10933/10987	B.1.1.7	nasal wash	YES	None
	59	K18-hACE2 mouse	10933/10987	B.1.1.7	nasal wash	YES	None
	60	K18-hACE2 mouse	2B04/47D11	B.1.1.7	nasal wash	YES	None
	61	K18-hACE2 mouse	2B04/47D11	B.1.1.7	nasal wash	No (Below LOD)
	62	K18-hACE2 mouse	LY-CoV555	B.1.1.7	nasal wash	YES	None
	63	K18-hACE2 mouse	LY-CoV555	B.1.1.7	nasal wash	YES	None
	64	K18-hACE2 mouse	10933/10987	N501Y/D614G	nasal wash	YES	None
	65	K18-hACE2 mouse	10933/10987	N501Y/D614G	nasal wash	No (Below LOD)
	66	K18-hACE2 mouse	2B04/47D11	N501Y/D614G	nasal wash	No (Below LOD)
	67	K18-hACE2 mouse	2B04/47D11	N501Y/D614G	nasal wash	No (Below LOD)
	68	K18-hACE2 mouse	10933/10987	Wash SA-B.1.351	nasal wash	No (Below LOD)
	69	K18-hACE2 mouse	10933/10987	Wash SA-B.1.351	nasal wash	YES	None
	70	K18-hACE2 mouse	10933/10987	Wash SA-B.1.351	nasal wash	YES	None
	71	K18-hACE2 mouse	2B04/47D11	Wash SA-B.1.351	nasal wash	YES	None
	72	K18-hACE2 mouse	2B04/47D11	Wash SA-B.1.351	nasal wash	No (Below LOD)
	73	K18-hACE2 mouse	2B04/47D11	Wash SA-B.1.351	nasal wash	YES	None
	74	K18-hACE2 mouse	LY-CoV555	Wash SA-B.1.351	nasal wash	No (Below LOD)
	75	K18-hACE2 mouse	LY-CoV555	Wash SA-B.1.351	nasal wash	No (Below LOD)
	76	K18-hACE2 mouse	10933/10987	Wash BR-B.1.1.28	nasal wash	No (Below LOD)
	77	K18-hACE2 mouse	10933/10987	Wash BR-B.1.1.28	nasal wash	YES	None
	78	K18-hACE2 mouse	2B04/47D11	Wash BR-B.1.1.28	nasal wash	No (Below LOD)
	79	K18-hACE2 mouse	2B04/47D11	Wash BR-B.1.1.28	nasal wash	YES	None
	80	K18-hACE2 mouse	2B04/47D11	Wash BR-B.1.1.28	nasal wash	YES	None
	81	K18-hACE2 mouse	LY-CoV555	Wash BR-B.1.1.28	nasal wash	YES	None
	82	K18-hACE2 mouse	LY-CoV555	Wash BR-B.1.1.28	nasal wash	YES	None
	83	K18-hACE2 mouse	LY-CoV555	Wash BR-B.1.1.28	nasal wash	YES	None
	84	K18-hACE2 mouse	hE16	Wash BR-B.1.1.28	nasal wash	YES	None
	85	K18-hACE2 mouse	hE16	Wash BR-B.1.1.28	nasal wash	YES	None
	86	K18-hACE2 mouse	10933/10987	B.1.1.7	nasal wash	No (Below LOD)
	87	K18-hACE2 mouse	2B04/47D11	B.1.1.7	nasal wash	No (Below LOD)
	88	K18-hACE2 mouse	LY-CoV555	B.1.1.7	nasal wash	No (Below LOD)
	89	K18-hACE2 mouse	hE16	B.1.1.7	nasal wash	YES	None
	90	K18-hACE2 mouse	hE16	B.1.1.7	nasal wash	YES	None
	91	K18-hACE2 mouse	10933/10987	N501Y/D614G	nasal wash	No (Below LOD)
	92	K18-hACE2 mouse	LY-CoV555	N501Y/D614G	nasal wash	No (Below LOD)
	93	K18-hACE2 mouse	LY-CoV555	N501Y/D614G	nasal wash	No (Below LOD)
	94	K18-hACE2 mouse	hE16	N501Y/D614G	nasal wash	YES	None
	95	K18-hACE2 mouse	hE16	N501Y/D614G	nasal wash	YES	None
	96	K18-hACE2 mouse	2196/2130	N501Y/D614G	nasal wash	No (Below LOD)
	97	K18-hACE2 mouse	2196/2130	N501Y/D614G	nasal wash	No (Below LOD)
	98	K18-hACE2 mouse	S309/S2E12	N501Y/D614G	nasal wash	No (Below LOD)
	99	K18-hACE2 mouse	S309/S2E12	N501Y/D614G	nasal wash	No (Below LOD)
	100	K18-hACE2 mouse	2196/2130	B.1.1.7	nasal wash	No (Below LOD)
	101	K18-hACE2 mouse	2196/2130	B.1.1.7	nasal wash	No (Below LOD)
	102	K18-hACE2 mouse	S309/S2E12	B.1.1.7	nasal wash	No (Below LOD)
	103	K18-hACE2 mouse	S309/S2E12	B.1.1.7	nasal wash	No (Below LOD)
	104	K18-hACE2 mouse	2196/2130	Wash SA-B.1.351	nasal wash	No (Below LOD)
	105	K18-hACE2 mouse	2196/2130	Wash SA-B.1.351	nasal wash	No (Below LOD)
	106	K18-hACE2 mouse	S309/S2E12	Wash SA-B.1.351	nasal wash	No (Below LOD)
	107	K18-hACE2 mouse	S309/S2E12	Wash SA-B.1.351	nasal wash	No (Below LOD)
	108	K18-hACE2 mouse	2196/2130	Wash BR-B.1.1.28	nasal wash	No (Below LOD)
	109	K18-hACE2 mouse	2196/2130	Wash BR-B.1.1.28	nasal wash	No (Below LOD)
	110	K18-hACE2 mouse	S309/S2E12	Wash BR-B.1.1.28	nasal wash	No (Below LOD)
	111	K18-hACE2 mouse	S309/S2E12	Wash BR-B.1.1.28	nasal wash	No (Below LOD)
	112	K18-hACE2 mouse	10933/10987	Wash SA-B.1.351	brain	YES	None
	113	K18-hACE2 mouse	LY-CoV555	Wash SA-B.1.351	brain	YES	None
	114	K18-hACE2 mouse	hE16	Wash SA-B.1.351	brain	YES	None
	115	K18-hACE2 mouse	2B04/47D11	Wash BR-B.1.1.28	brain	YES	None
	116	K18-hACE2 mouse	2B04/47D11	Wash BR-B.1.1.28	brain	YES	None
	117	K18-hACE2 mouse	2B04/47D11	Wash BR-B.1.1.28	brain	YES	None
	118	K18-hACE2 mouse	LY-CoV555	Wash BR-B.1.1.28	brain	YES	None
	119	K18-hACE2 mouse	hE16	Wash BR-B.1.1.28	brain	YES	None
	120	K18-hACE2 mouse	LY-CoV555	B.1.1.7	brain	No (Below LOD)
	121	K18-hACE2 mouse	LY-CoV555	B.1.1.7	brain	YES	None
	122	K18-hACE2 mouse	hE16	B.1.1.7	brain	YES	None
	123	K18-hACE2 mouse	LY-CoV555	N501Y/D614G	brain	No (Below LOD)
	124	K18-hACE2 mouse	hE16	N501Y/D614G	brain	No (Below LOD)
	125	Hamster	Control mAb	Wash SA-B.1.351	lung	No (Below LOD)
	126	Hamster	Control mAb	Wash SA-B.1.351	lung	YES	None
	127	Hamster	Control mAb	Wash SA-B.1.351	lung	No (Below LOD)
	128	Hamster	Control mAb	Wash SA-B.1.351	lung	YES	None
	129	Hamster	Control mAb	Wash SA-B.1.351	lung	YES	None
	130	Hamster	2196/2130	Wash SA-B.1.351	lung	YES	None
	131	Hamster	2196/2130	Wash SA-B.1.351	lung	No (Below LOD)
	132	Hamster	2196/2130	Wash SA-B.1.351	lung	No (Below LOD)
	133	Hamster	2196/2130	Wash SA-B.1.351	lung	No (Below LOD)
	134	Hamster	2196/2130	Wash SA-B.1.351	lung	YES	None
	135	Hamster	Control mAb	D614G	lung	YES	None
	136	Hamster	Control mAb	D614G	lung	YES	None
	137	Hamster	Control mAb	D614G	lung	No (Below LOD)
	138	Hamster	Control mAb	D614G	lung	YES	None
	139	Hamster	Control mAb	D614G	lung	YES	None
	140	Hamster	2196/2130	D614G	lung	No (Below LOD)
	141	Hamster	2196/2130	D614G	lung	No (Below LOD)
	142	Hamster	2196/2130	D614G	lung	No (Below LOD)
	143	Hamster	2196/2130	D614G	lung	YES	None
	144	Hamster	2196/2130	D614G	lung	No (Below LOD)
