# Supplementary material for: In vivo monoclonal antibody efficacy against SARS-CoV-2 variant strains
Source: Res Sq. 2021 Apr 23:rs.3.rs-448370. Preprint. [Version 1] doi: 10.21203/rs.3.rs-448370/v1 (PMC8132254; doi:10.21203/rs.3.rs-448370/v1)
Supplement: Supplement 9 [file 13c3fa2806d439495a3e8575.xlsx]

## Sheet: Sheet1
Model	mAb	Virus	Antibody dose (mg/kg)	Day post-mAb Administration	Mean Serum Concentration (ug/mL)
Golden Syrian Hamster	COV2-2130/COV2-2196	Wash SA-B.1.351	4	5	19.4259
Golden Syrian Hamster	COV2-2130/COV2-2196	WA1/2020 D614G	4	5	19.5613
129S2 Mouse	COV2-2130/COV2-2196	Wash SA-B.1.351	2	4	26.9422
129S2 Mouse	COV2-2130/COV2-2196	Wash BR-B.1.1.28	2	4	18.4268
129S2 Mouse	COV2-2130/COV2-2196	B.1.1.7	2	4	19.8346
129S2 Mouse	COV2-2130/COV2-2196	WA1/2020 D614G/N501Y	2	4	22.3187
K18 hACE2 Transgenic Mouse	COV2-2130/COV2-2196	Wash SA-B.1.351	2	7	11.2047
K18 hACE2 Transgenic Mouse	COV2-2130/COV2-2196	Wash BR-B.1.1.28	2	7	13.3406
K18 hACE2 Transgenic Mouse	COV2-2130/COV2-2196	B.1.1.7	2	7	13.7804
K18 hACE2 Transgenic Mouse	COV2-2130/COV2-2196	WA1/2020 D614G/N501Y	2	7	11.6169
